# Supplementary material for: A Host Transcriptional Signature for Presymptomatic Detection of Infection in Humans Exposed to Influenza H1N1 or H3N2
Source: PLoS One. 2013 Jan 9;8(1):e52198. doi: 10.1371/journal.pone.0052198 (PMC3541408; doi:10.1371/journal.pone.0052198)
Supplement: Methods S1 — Additional material defining the statistical models used are presented. (PDF) [file pone.0052198.s012.pdf]

## SUPPLEMENTAL MATERIAL ON METHODS

The observed data are represented as  $\mathbf{X} \in \mathbb{R}^{p \times n}$ , where each column corresponds to one of  $n$  samples, quantifying the associated gene-expression values for all  $p$  genes under investigation. A factor model [1]–[4] is employed. Specifically, the data are assumed to satisfy

$$\mathbf{X} = \mathbf{A}\mathbf{S} + \mathbf{E} \quad (1)$$

where  $\mathbf{A} \in \mathbb{R}^{p \times r}$ ,  $\mathbf{S} \in \mathbb{R}^{r \times n}$  and  $\mathbf{E} \in \mathbb{R}^{p \times n}$ . We assume that the gene-expression data are centered in advance of the analysis; otherwise, there should be an intercept added to the model. Considering the  $j$ th sample,  $\mathbf{x}_j$ , corresponding to the  $j$ th column of  $\mathbf{X}$ , the model states that  $\mathbf{x}_j = \mathbf{A}\mathbf{s}_j + \mathbf{e}_j$ , where  $\mathbf{s}_j$  and  $\mathbf{e}_j$  are the  $j$ th columns of  $\mathbf{S}$  and  $\mathbf{E}$ , respectively.

The columns of  $\mathbf{A}$  represent the factor “loadings”, and rows of  $\mathbf{S}$  are often called factors. To address the fact that  $n \ll p$ , we impose a sparseness constraint on the columns of  $\mathbf{A}$  [4], with the idea that each column of  $\mathbf{A}$  should ideally correspond to a biological “pathway”, which should be defined by a relatively small number of correlated genes. Within Bayesian formalisms, the sparse columns of  $\mathbf{A}$  are imposed via spike-slab-like priors [4], [5], as discussed further below.

For the factor model in (1),  $r$  defines the number of factors responsible for the data  $\mathbf{X}$ , and it is not known in general, and must be inferred. Within the analysis we consider  $K$  *potential* factors ( $K$  columns of  $\mathbf{A}$ ), with  $K$  set to a value anticipated to be large relative to  $r$ . We then infer the number of columns of  $\mathbf{A}$  needed to represent the observed data  $\mathbf{X}$ , with this number used as an estimate of  $r$ . Since we will be performing a Bayesian analysis, we will infer a posterior density function on  $r$ . Henceforth we assume  $\mathbf{A}$  has  $K$  columns, with the understanding that we wish to infer the  $r < K$  columns that are actually needed to represent the data.

Let  $\mathbf{a}_k$  represent the  $k$ th column of  $\mathbf{A}$ , for  $k = 1, \dots, K$ , and  $\mathbf{e}_j$  and  $\mathbf{s}_j$  represent respectively the  $j$ th columns of  $\mathbf{E}$  and  $\mathbf{S}$  (with  $j = 1, \dots, n$ ). Within the imposed prior, vectors  $\mathbf{e}_j$  and  $\mathbf{s}_j$  are generated as  $\mathbf{s}_j \sim \mathcal{N}(0, \mathbf{I}_K)$ , and  $\mathbf{e}_j \sim \mathcal{N}(0, \text{diag}(\psi_1^{-1}, \dots, \psi_p^{-1}))$ ;  $\mathbf{I}_K$  is the  $K \times K$  identity matrix and the precisions  $(\psi_1, \dots, \psi_p)$  are all drawn i.i.d. from a gamma prior. To define sparseness on the  $\mathbf{a}_k$  [4] we employ a spike-slab prior:

$$A_{lk} \sim w_{lk}\delta_0 + (1 - w_{lk})\mathcal{N}(0, \alpha_k^{-1}) \quad , \quad w_{lk} \sim \text{Beta}(a, b) \quad , \quad \alpha_k \sim \text{Gamma}(c, d) \quad (2)$$

where  $(a, b)$  are selected as to strongly favor  $w_{lk} \rightarrow 1$ ,  $\delta_0$  is a distribution concentrated at zero, and  $l = 1, \dots, p$ .

The Beta Process (BP) is used to infer the number of needed factors  $r$  [6]–[9]. Specifically, for each of the  $K$  potential factors, there is an associated probability  $\pi_k$ , for  $k = 1, \dots, K$ , and a particular data sample utilizes the  $k$ th factor with probability  $\pi_k$ , and doesn’t use it with probability  $1 - \pi_k$  (*i.e.*, Bernoulli). Within the model each of the  $\pi_k$  are drawn

$$\pi_k \sim \text{Beta}(\alpha/K, \beta(K - 1)/K) \quad (3)$$

Note that for finite settings of the parameters  $\alpha$  and  $\beta$ , this is a degenerate beta distribution [6], which strongly favors  $\pi_k \rightarrow 0$ . Therefore, what this model is imposing is that as the number of potential factors  $K$  becomes large, only a small subset of the  $\{\pi_k\}_{k=1, K}$  are likely to be large, and therefore only a small subset of factors are utilized to represent the data. The model therefore encourages a parsimonious use of factors for representation of the data; more details may be found in [6]–[9].

The computations are performed using Gibbs sampling, for which all needed conditional density functions are analytic. The results presented here correspond to using 5000 collection samples, after a burn-in of 2000 iterations. However, with 2000 burn-in iterations and 500 collection samples, the average results of the factor scores and factor loadings are almost identical to those found with 5000.

## REFERENCES

- [1] P. Rai and H. Daum'e III, "The infinite hierarchical factor regression model," in *Proc. Conf. Neural Information Proc. Systems (NIPS)*, Vancouver, Canada, 2008.
- [2] D. Knowles and Z. Ghahramani, "Infinite sparse factor analysis and infinite independent components analysis," in *7th International Conference on Independent Component Analysis and Signal Separation*, 2007.
- [3] E. Meeds, Z. Ghahramani, R. Neal, and S. Roweis, "Modeling dyadic data with binary latent factors," in *Advances in Neural Information Processing Systems*, 2007, pp. 977–984.
- [4] C. Carvalho, J. Chang, J. Lucas, J. R. Nevins, Q. Wang, and M. West, "High-dimensional sparse factor modelling: Applications in gene expression genomics," *Journal of the American Statistical Association*, vol. 103, pp. 1438–1456, 2008.
- [5] M. West, "Bayesian factor regression models in the "large p, small n" paradigm," in *Bayesian Statistics 7*, J. M. Bernardo, M. Bayarri, J. Berger, A. Dawid, D. Heckerman, A. Smith, and M. West, Eds. Oxford University Press, 2003, pp. 723–732.
- [6] R. Thibaux and M. Jordan, "Hierarchical beta processes and the Indian buffet process," in *International Conference on Artificial Intelligence and Statistics*, 2007.
- [7] T. Griffiths and Z. Ghahramani, "Infinite latent feature models and the indian buffet process," in *Advances in Neural Information Processing Systems*, 2005, pp. 475–482.
- [8] F. Doshi-Velez, K. Miller, J. V. Gael, and Y. Teh, "Variational inference for the indian buffet process," in *AISTATS*, 2009.
- [9] J. Paisley and L. Carin, "Nonparametric factor analysis with beta process priors," in *Int. Conf. Machine Learning*, 2009.
