# Supplementary material for: A Host Transcriptional Signature for Presymptomatic Detection of Infection in Humans Exposed to Influenza H1N1 or H3N2
Source: PLOS journal article supplement (doi:10.1371/journal.pone.0052198), 2013-01-09

**Figure s4.** Genes comprising the discriminative Factor for Influenza infection are involved in canonical antiviral pathways, such as the STAT-1 dependent portions of Interferon-response and dsRNA-induced innate signaling depicted here (top), and the IRF-7 and RIG-I, MDA-5 dependent portions of Interferon-response and ssRNA-induced innate signaling (bottom, [www.genego.com](http://www.genego.com)). Pathways impacted by genes from the discriminative Factors are marked with a red target symbol.

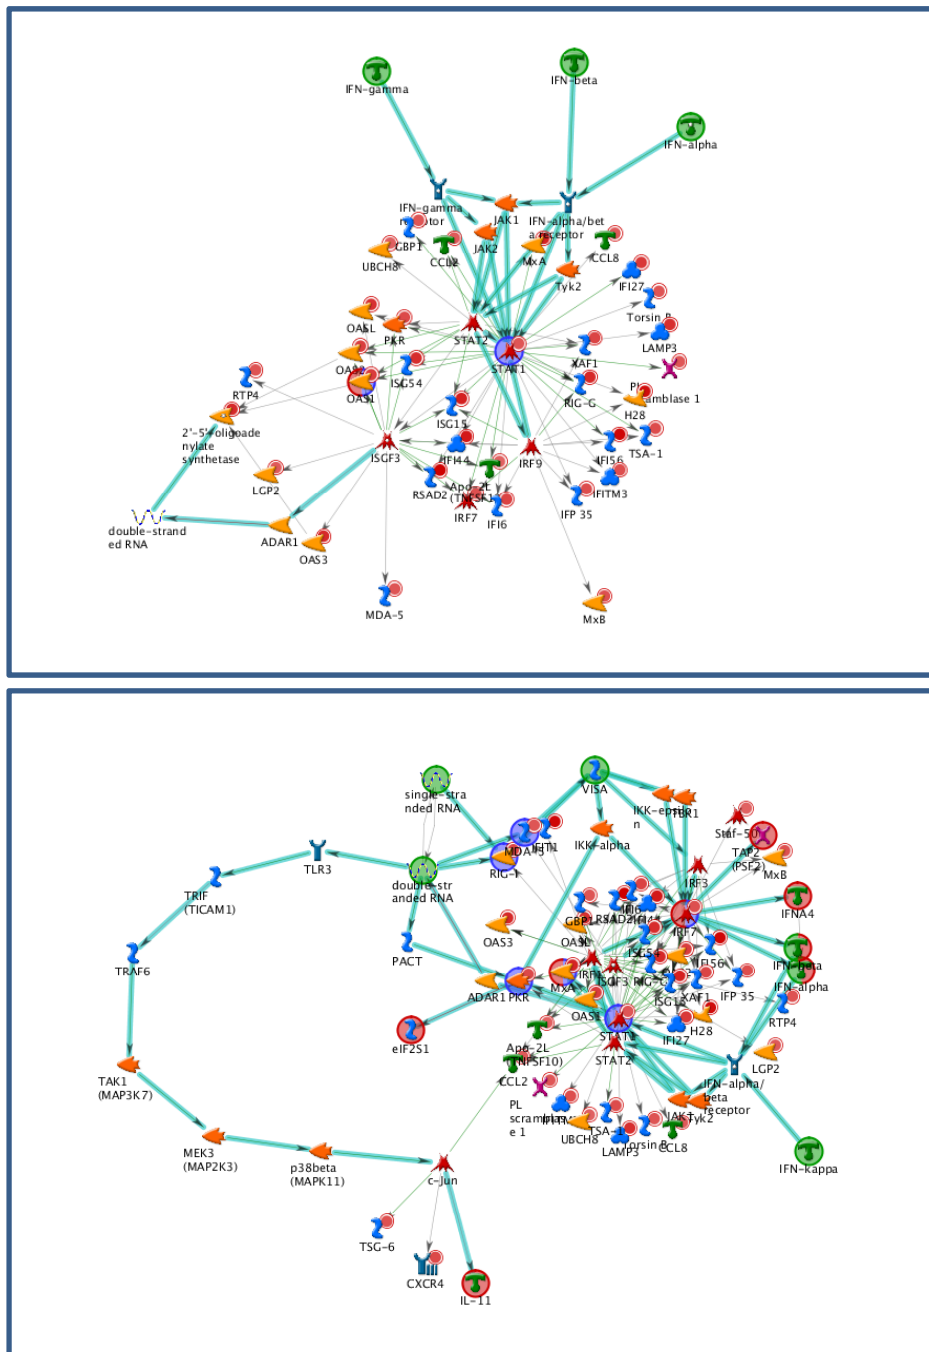

Supplement: S4 (10.1371/journal.pone.0052198.s004) [file journal.pone.0052198.s004]
