# Supplementary material for: A Host Transcriptional Signature for Presymptomatic Detection of Infection in Humans Exposed to Influenza H1N1 or H3N2
Source: PLOS journal article supplement (doi:10.1371/journal.pone.0052198), 2013-01-09

**Figure s5.** Temporal development of the combined Influenza Factor applied to H1N1 (top) and H3N2 (bottom) cohorts.

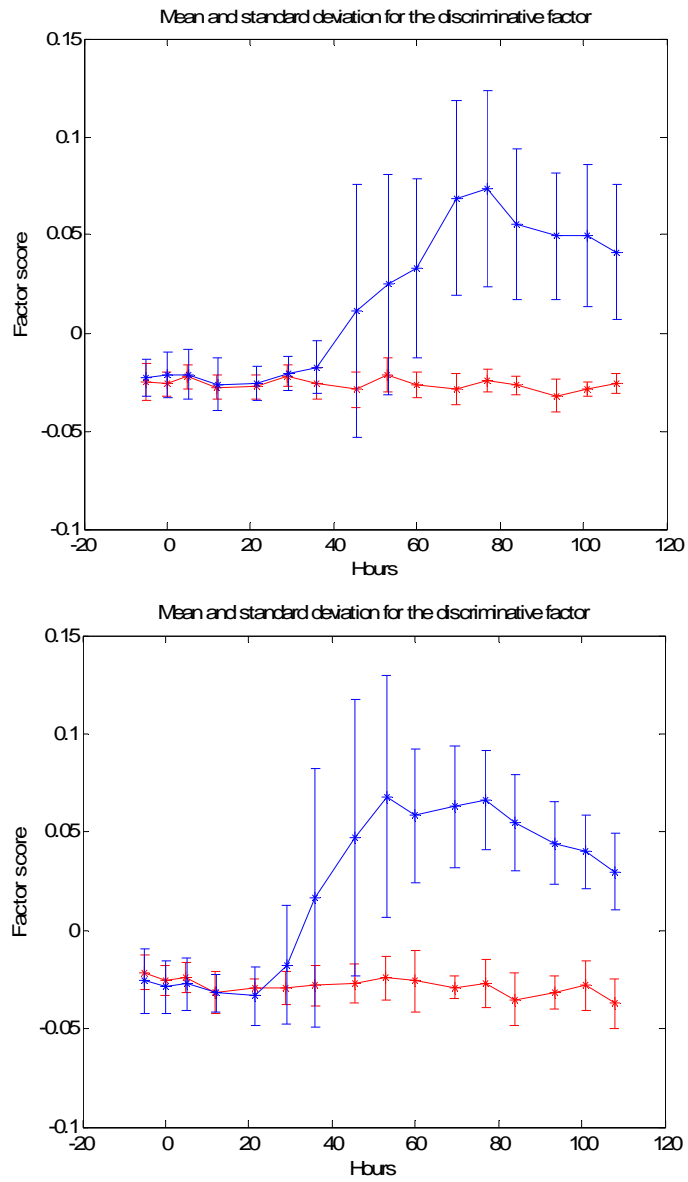

Supplement: S5 (10.1371/journal.pone.0052198.s005) [file journal.pone.0052198.s005]
